# Supplementary material for: Is there evidence of sustained human-mosquito-human transmission of the zoonotic malaria Plasmodium knowlesi? A systematic literature review
Source: Malar J. 2022 Mar 17;21:89. doi: 10.1186/s12936-022-04110-z (PMC8929260; doi:10.1186/s12936-022-04110-z)
Supplement: Supplementary file 3 — Additional file 3. Human cases of P. knowlesi [file 12936_2022_4110_MOESM3_ESM.csv]

ID	Infection	Diagnosis	Number	Date	Year	Country	Location	Source_ID	Source
2	P knowlesi	Morphology	1	Feb-71	1971	Malaysia	Johore	382	A presumptive case of naturally occurring Plasmodium knowlesi malaria in man in Malaysia, Fong et al, 1971
3	P knowlesi	PCR (ssu rRNA)	1	Aug-00	2000	Thailand	Prachuap Khiri Khan Province	331	Naturally acquired Plasmodium knowlesi malaria in human, Thailand; Jongwutiwes et al, 2004
4	P knowlesi	Sequencing	1	Mar-07	2007	Malaysia	Unsure	312	Monkey malaria in a European traveler returning from Malaysia, Kantele et al, 2008
5	P knowlesi	PCR	3	2006	2006	Philippines	Roxas, Palawan	207	Human Infections with Plasmodium knowlesi, the Philippines, Luchavez et al, 2008
6	P knowlesi	PCR	106	2004	2004	Malaysia	Kapit, Sarawak	261	A large focus of naturally acquired Plasmodium knowlesi infections in human beings, Singh et al. 2004
7	Mixed Pk/Pf	PCR	5	2004	2004	Malaysia	Kapit, Sarawak	261	A large focus of naturally acquired Plasmodium knowlesi infections in human beings, Singh et al. 2004
8	Mixed Pk/Pv	PCR	8	2004	2004	Malaysia	Kapit, Sarawak	261	A large focus of naturally acquired Plasmodium knowlesi infections in human beings, Singh et al. 2004
9	Mixed Pk/Pf/Pv	PCR	1	2004	2004	Malaysia	Kapit, Sarawak	261	A large focus of naturally acquired Plasmodium knowlesi infections in human beings, Singh et al. 2004
10	P knowlesi	PCR	25	2008	2008	Malaysia	Sabah	109	Detection of Malaria Parasites in Sabah by Nested Polymerase Chain Reaction: A Focus of Naturally Acquired Plasmodium knowlesi Infections, Anderios et al. 2008
11	P knowlesi	PCR	243	2008	2008	Malaysia	Sarawak	366	Plasmodium knowlesi malaria in humans is widely distributed and potentially life threatening, Cox-Singh et al.2008
12	Mixed Pk/Pf	PCR	3	2008	2008	Malaysia	Sarawak	366	Plasmodium knowlesi malaria in humans is widely distributed and potentially life threatening, Cox-Singh et al.2008
13	Mixed Pk/Pv	PCR	19	2008	2008	Malaysia	Sarawak	366	Plasmodium knowlesi malaria in humans is widely distributed and potentially life threatening, Cox-Singh et al.2008
14	Mixed Pk/Po	PCR	1	2008	2008	Malaysia	Sarawak	366	Plasmodium knowlesi malaria in humans is widely distributed and potentially life threatening, Cox-Singh et al.2008
15	P knowlesi	PCR	32	2008	2008	Malaysia	Sabah	366	Plasmodium knowlesi malaria in humans is widely distributed and potentially life threatening, Cox-Singh et al.2008
16	Mixed Pk/Pf	PCR	1	2008	2008	Malaysia	Sabah	366	Plasmodium knowlesi malaria in humans is widely distributed and potentially life threatening, Cox-Singh et al.2008
17	Mixed Pk/Pv	PCR	7	2008	2008	Malaysia	Sabah	366	Plasmodium knowlesi malaria in humans is widely distributed and potentially life threatening, Cox-Singh et al.2008
18	Mixed Pk/Pm	PCR	1	2008	2008	Malaysia	Sabah	366	Plasmodium knowlesi malaria in humans is widely distributed and potentially life threatening, Cox-Singh et al.2008
19	P knowlesi	PCR	5	2008	2008	Malaysia	Pahang	366	Plasmodium knowlesi malaria in humans is widely distributed and potentially life threatening, Cox-Singh et al.2008
20	P knowlesi	PCR	1	2008	2008	Singapore	Lim Chu Kang or Bukit Batok Nature Reserve, speculative	330	Naturally acquired human Plasmodium knowlesi infection, Singapore. Ng et al. 2008
21	P knowlesi	PCR	65	2008	2008	Malaysia	Peninsula	355	Plasmodium knowlesi in humans, macaques and mosquitoes in peninsular Malaysia, Vythilingam et al. 2008
22	Mixed Pk/Pf	PCR	2	2008	2008	Malaysia	Peninsula	355	Plasmodium knowlesi in humans, macaques and mosquitoes in peninsular Malaysia, Vythilingam et al. 2008
23	Mixed Pk/Pv	PCR	7	2008	2008	Malaysia	Peninsula	355	Plasmodium knowlesi in humans, macaques and mosquitoes in peninsular Malaysia, Vythilingam et al. 2008
24	Mixed Pk/Pm	PCR	3	2008	2008	Malaysia	Peninsula	355	Plasmodium knowlesi in humans, macaques and mosquitoes in peninsular Malaysia, Vythilingam et al. 2008
25	P knowlesi	Sequencing	1	Oct-06	2006	Malaysia	Bario Highlands, Sarawak	435	Swedish traveller with Plasmodium knowlesi malaria after visiting Malaysian Borneo, Bronner et al, 2009
26	P knowlesi	Sequencing	1	Oct-07	2007	Philippines	Palawan	411	Simian malaria in a U.S. traveler--New York, 2008, CDC, 2009
27	P knowlesi	PCR	113	Jul 2006 - Feb 2008	2008	Malaysia	Kapit, Sarawak	84	Clinical and laboratory features of human Plasmodium knowlesi infection, Daneshvar et al, 2009
28	P knowlesi	PCR	3	2007	2007	Singapore	Lim Chu Kang	146	Epidemiological characteristics of imported and locally-acquired malaria in Singapore, Lee et al, 2009
29	P knowlesi	PCR	1	2007	2007	Singapore	Northwest (also visited Phuket ~month before symptoms)	70	Case report: Monkey malaria in humans: A diagnostic dilemma with conflicting laboratory data. Ong et al., 2009
30	P knowlesi	PCR	1	Oct 2006 - Sept 2007	2007	Thailand		119	Differential prevalence of Plasmodium infections and cryptic Plasmodium knowlesi malaria in humans in Thailand. Putaporntip et al., 2009
31	Mixed Pk/Pf	PCR	5	Oct 2006 - Sept 2007	2007	Thailand		119	Differential prevalence of Plasmodium infections and cryptic Plasmodium knowlesi malaria in humans in Thailand. Putaporntip et al., 2009
32	Mixed Pk/Pv	PCR	4	Oct 2006 - Sept 2007	2007	Thailand		119	Differential prevalence of Plasmodium infections and cryptic Plasmodium knowlesi malaria in humans in Thailand. Putaporntip et al., 2009
33	P knowlesi	Sequencing	2	Dec-04	2004	Vietnam	Ninh Thuan provinc	215	Human Plasmodium knowlesi infections in young children in central Vietnam. Van den Eede 2009
34	P knowlesi	PCR	3	Dec-04	2004	Vietnam	Ninh Thuan provinc	215	Human Plasmodium knowlesi infections in young children in central Vietnam. Van den Eede 2009
35	P knowlesi	Sequencing	1	Jan-09	2009	Malaysia	Kapit, Sarawak	210	Human Plasmodium knowlesi infection detected by rapid diagnostic tests for malaria, van Hellemond et al, 2009
36	P knowlesi	PCR	1	Unsure (report from Nov 2009)	2009	Malaysia	Queen Elizabeth Hospital, Kota Kinabalu, Sabah	406	Severe malaria - a case of fatal Plasmodium knowlesi infection with post-mortem findings: a case report, Cox-Singh et al, 2010
37	P knowlesi	Sequencing	1	2010	2010	Indonesia	South Kalimantan Province, Borneo	354	Plasmodium knowlesi in human, Indonesian Borneo, Figtree et al, 2010
38	P knowlesi	Sequencing	4	2008	2008	Myanmar	North Myanmar	89	Co-infections with Plasmodium knowlesi and other malaria parasites, Myanmar, Jiang et al, 2010
39	Mixed Pk/Pf	Sequencing	13	2008	2008	Myanmar	North Myanmar	89	Co-infections with Plasmodium knowlesi and other malaria parasites, Myanmar, Jiang et al, 2010
40	Mixed Pk/Pv	Sequencing	13	2008	2008	Myanmar	North Myanmar	89	Co-infections with Plasmodium knowlesi and other malaria parasites, Myanmar, Jiang et al, 2010
41	Mixed Pk/Pf/Pf	Sequencing	2	2008	2008	Myanmar	North Myanmar	89	Co-infections with Plasmodium knowlesi and other malaria parasites, Myanmar, Jiang et al, 2010
42	P knowlesi	PCR	1	Jul-07	2007	Malaysia		213	Human Plasmodium knowlesi infections in Klang Valley, Peninsula Malaysia: a case series, Leet et al, 2010
43	P knowlesi	PCR	1	Aug-07	2007	Malaysia	Bario, Sarawak	213	Human Plasmodium knowlesi infections in Klang Valley, Peninsula Malaysia: a case series, Leet et al, 2010
44	P knowlesi	PCR	1	Mar-08	2008	Malaysia	Pahang	213	Human Plasmodium knowlesi infections in Klang Valley, Peninsula Malaysia: a case series, Leet et al, 2010
45	P knowlesi	PCR	1	May-08	2008	Malaysia	Ampang	213	Human Plasmodium knowlesi infections in Klang Valley, Peninsula Malaysia: a case series, Leet et al, 2010
46	P knowlesi	PCR	1	Mary 2008	2008	Malaysia	Labuan, Borneo	213	Human Plasmodium knowlesi infections in Klang Valley, Peninsula Malaysia: a case series, Leet et al, 2010
47	P knowlesi	PCR	1	Jun-08	2008	Malaysia	Kuala Kubu, Bharu, Selangor	213	Human Plasmodium knowlesi infections in Klang Valley, Peninsula Malaysia: a case series, Leet et al, 2010
48	P knowlesi	PCR	1	Jun-08	2008	Malaysia	Kuala Kubu Bharu	213	Human Plasmodium knowlesi infections in Klang Valley, Peninsula Malaysia: a case series, Leet et al, 2010
49	P knowlesi	Sequencing	1	December 2008–February 2009	2009	Indonesia	South Kalimantan Province, Borneo	118	Diagnostic difficulties with Plasmodium knowlesi infection in humans, Sulistyaningsih et al., 2010
50	P knowlesi	Sequencing	1	2008-2009	2009	South-East Asia	Bangkok/Banda Aceh, Pulau Weh/Kuala Lumpur/Hanoi	172	First case of detection of Plasmodium knowlesi in Spain by Real Time PCR in a traveller from Southeast Asia. Ta et al., 2010
51	P knowlesi	Sequencing	1	Nov 2009-Feb 2010	2010	Thailand	Ko Payam/Rangon	226	Imported Plasmodium knowlesi malaria in a French tourist returning from Thailand. Berry et al., 2011
52	P knowlesi	Sequencing	1	Jun-10	2010	Malaysia	Sabah or Sarawak	353	Plasmodium knowlesi in a traveller returning to New Zealand, Hoosen et al, 2011
53	Mixed Pk/Pv	PCR	1	1996	1996	Thailand	Tak	365	Plasmodium knowlesi Malaria in humans and macaques, Thailand
54	Mixed Pk/Pf	PCR	2	Oct 2008 - Sept 2019	2019	Thailand	Tak	365	Plasmodium knowlesi Malaria in humans and macaques, Thailand
55	Mixed Pk/Pv	PCR	2	Oct 2008 - Sept 2019	2019	Thailand	Tak	365	Plasmodium knowlesi Malaria in humans and macaques, Thailand
56	Mixed Pk/Pf/Pv	PCR	1	Oct 2008 - Sept 2019	2019	Thailand	Tak	365	Plasmodium knowlesi Malaria in humans and macaques, Thailand
57	P knowlesi	PCR	3	Oct 2008 - Sept 2019	2019	Thailand	Chantaburi	365	Plasmodium knowlesi Malaria in humans and macaques, Thailand
58	Mixed Pk/Pv	PCR	1	Oct 2008 - Sept 2019	2019	Thailand	Chantaburi	365	Plasmodium knowlesi Malaria in humans and macaques, Thailand
59	Mixed Pk/Pf/Pv	PCR	3	Oct 2008 - Sept 2019	2019	Thailand	Chantaburi	365	Plasmodium knowlesi Malaria in humans and macaques, Thailand
60	P knowlesi	PCR	2	Oct 2008 - Sept 2019	2019	Thailand	Yala	365	Plasmodium knowlesi Malaria in humans and macaques, Thailand
61	Mixed Pk/Pf	PCR	3	Oct 2008 - Sept 2019	2019	Thailand	Yala	365	Plasmodium knowlesi Malaria in humans and macaques, Thailand
62	P knowlesi	PCR	3	Oct 2008 - Sept 2019	2019	Thailand	Narathiwat	365	Plasmodium knowlesi Malaria in humans and macaques, Thailand
63	Mixed Pk/Pf	PCR	1	Oct 2008 - Sept 2019	2019	Thailand	Narathiwat	365	Plasmodium knowlesi Malaria in humans and macaques, Thailand
64	Mixed Pk/Pv	PCR	1	Oct 2008 - Sept 2019	2019	Thailand	Narathiwat	365	Plasmodium knowlesi Malaria in humans and macaques, Thailand
65	Mixed Pk/Pf/Pv	PCR	1	Oct 2008 - Sept 2019	2019	Thailand	Narathiwat	365	Plasmodium knowlesi Malaria in humans and macaques, Thailand
66	P knowlesi	Sequencing	1	Apr-10	2010	Cambodia	Pailin	359	Plasmodium knowlesi infection in humans, Cambodia, 2007-2010, Khim et al, 2011
67	P knowlesi	Sequencing	1	Sep-10	2010	Cambodia	Phnomdambang village	359	Plasmodium knowlesi infection in humans, Cambodia, 2007-2010, Khim et al, 2011
68	P knowlesi	PCR	10	Feb - Nov 2010	2010	Malaysia	Keningau, Sabah	230	Incidence of malaria in the interior division of Sabah, Malaysian Borneo, Based on nested PCR. Joveen-Neoh et al., 2011
69	P knowlesi	PCR	12	Feb - Nov 2010	2010	Malaysia	Tambunan, Sabah	230	Incidence of malaria in the interior division of Sabah, Malaysian Borneo, Based on nested PCR. Joveen-Neoh et al., 2011
70	P knowlesi	PCR	35	Feb - Nov 2010	2010	Malaysia	Tenom, Sabah	230	Incidence of malaria in the interior division of Sabah, Malaysian Borneo, Based on nested PCR. Joveen-Neoh et al., 2011
71	P knowlesi	PCR	6	Feb - Nov 2010	2010	Malaysia	Nabawan, Sabah	230	Incidence of malaria in the interior division of Sabah, Malaysian Borneo, Based on nested PCR. Joveen-Neoh et al., 2011
72	Mixed Pk/Pf	PCR	1	Feb - Nov 2010	2010	Malaysia	Keningau, Sabah	230	Incidence of malaria in the interior division of Sabah, Malaysian Borneo, Based on nested PCR. Joveen-Neoh et al., 2011
73	Mixed Pk/Pv	PCR	1	Feb - Nov 2010	2010	Malaysia	Keningau, Sabah	230	Incidence of malaria in the interior division of Sabah, Malaysian Borneo, Based on nested PCR. Joveen-Neoh et al., 2011
75	Mixed Pk/Pf	PCR	1	Mar 2009 - Mar 2010	2010	Vietnam	Khanh Phu	88	Co-infections of Plasmodium knowlesi, P. falciparum, and P. vivax among Humans and Anopheles dirus Mosquitoes, Southern Vietnam. Marchand et al 2011
76	Mixed Pk/Pv	PCR	12	Mar 2009 - Mar 2010	2010	Vietnam	Khanh Phu	88	Co-infections of Plasmodium knowlesi, P. falciparum, and P. vivax among Humans and Anopheles dirus Mosquitoes, Southern Vietnam. Marchand et al 2011
77	Mixed Pk/Pf/Pv	PCR	19	Mar 2009 - Mar 2010	2010	Vietnam	Khanh Phu	88	Co-infections of Plasmodium knowlesi, P. falciparum, and P. vivax among Humans and Anopheles dirus Mosquitoes, Southern Vietnam. Marchand et al 2011
78	P knowlesi	PCR	1	2009	2009	Malaysia	Beaufort, Sabah	199	Geographic and ethnic distribution of P knowlesi infection in Sabah, Malaysia. Naing et al., 2011
79	P knowlesi	PCR	28	2009	2009	Malaysia	Keningau, Sabah	199	Geographic and ethnic distribution of P knowlesi infection in Sabah, Malaysia. Naing et al., 2011
80	P knowlesi	PCR	2	2009	2009	Malaysia	Kinabatangan, Sabah	199	Geographic and ethnic distribution of P knowlesi infection in Sabah, Malaysia. Naing et al., 2011
81	P knowlesi	PCR	128	2009	2009	Malaysia	Kudat, Sabah	199	Geographic and ethnic distribution of P knowlesi infection in Sabah, Malaysia. Naing et al., 2011
82	P knowlesi	PCR	1	2009	2009	Malaysia	Likas Hospital, Kota Kinabalu Sabah	199	Geographic and ethnic distribution of P knowlesi infection in Sabah, Malaysia. Naing et al., 2011
83	P knowlesi	PCR	17	2009	2009	Malaysia	Queen Elizabeth Hospital, Kota Kinabalu, Sabah	199	Geographic and ethnic distribution of P knowlesi infection in Sabah, Malaysia. Naing et al., 2011
84	P knowlesi	PCR	33	2009	2009	Malaysia	Ranau, Sabah	199	Geographic and ethnic distribution of P knowlesi infection in Sabah, Malaysia. Naing et al., 2011
85	P knowlesi	PCR	2	2009	2009	Malaysia	Tambunan, Sabah	199	Geographic and ethnic distribution of P knowlesi infection in Sabah, Malaysia. Naing et al., 2011
86	P knowlesi	PCR	1	2009	2009	Malaysia	Tawau, Sabah	199	Geographic and ethnic distribution of P knowlesi infection in Sabah, Malaysia. Naing et al., 2011
87	P knowlesi	PCR	43	2009	2009	Malaysia	Tenom, Sabah	199	Geographic and ethnic distribution of P knowlesi infection in Sabah, Malaysia. Naing et al., 2011
88	Mixed Pk/Pf	PCR	1	2009	2009	Malaysia	Likas Hospital, Kota Kinabalu Sabah	199	Geographic and ethnic distribution of P knowlesi infection in Sabah, Malaysia. Naing et al., 2011
89	Mixed Pk/Pf	PCR	1	2009	2009	Malaysia	Queen Elizabeth Hospital, Kota Kinabalu, Sabah	199	Geographic and ethnic distribution of P knowlesi infection in Sabah, Malaysia. Naing et al., 2011
90	Mixed Pk/Pv	PCR	22	2009	2009	Malaysia	Keningau, Sabah	199	Geographic and ethnic distribution of P knowlesi infection in Sabah, Malaysia. Naing et al., 2011
91	Mixed Pk/Pv	PCR	15	2009	2009	Malaysia	Kudat, Sabah	199	Geographic and ethnic distribution of P knowlesi infection in Sabah, Malaysia. Naing et al., 2011
92	Mixed Pk/Pv	PCR	2	2009	2009	Malaysia	Likas Hospital, Kota Kinabalu Sabah	199	Geographic and ethnic distribution of P knowlesi infection in Sabah, Malaysia. Naing et al., 2011
93	Mixed Pk/Pv	PCR	10	2009	2009	Malaysia	Queen Elizabeth Hospital, Kota Kinabalu, Sabah	199	Geographic and ethnic distribution of P knowlesi infection in Sabah, Malaysia. Naing et al., 2011
94	Mixed Pk/Pv	PCR	23	2009	2009	Malaysia	Ranau, Sabah	199	Geographic and ethnic distribution of P knowlesi infection in Sabah, Malaysia. Naing et al., 2011
95	Mixed Pk/Pv	PCR	2	2009	2009	Malaysia	Tambunan, Sabah	199	Geographic and ethnic distribution of P knowlesi infection in Sabah, Malaysia. Naing et al., 2011
96	Mixed Pk/Pv	PCR	9	2009	2009	Malaysia	Tenom, Sabah	199	Geographic and ethnic distribution of P knowlesi infection in Sabah, Malaysia. Naing et al., 2011
97	Mixed Pk/Pm	PCR	2	2009	2009	Malaysia	Queen Elizabeth Hospital, Kota Kinabalu, Sabah	199	Geographic and ethnic distribution of P knowlesi infection in Sabah, Malaysia. Naing et al., 2011
98	P knowlesi	PCR	56	Dec 2007 - Nov 2009	2009	Malaysia	Queen Elizabeth Hospital, Kota Kinabalu, Sabah	409	Severe Plasmodium knowlesi malaria in a tertiary care hospital, Sabah, Malaysia, William et al, 2011
99	Mixed Pk/Pv	PCR	3	Dec 2007 - Nov 2009	2009	Malaysia	Queen Elizabeth Hospital, Kota Kinabalu, Sabah	409	Severe Plasmodium knowlesi malaria in a tertiary care hospital, Sabah, Malaysia, William et al, 2011
100	Mixed Pk/Pf	PCR	1	Dec 2007 - Nov 2009	2009	Malaysia	Queen Elizabeth Hospital, Kota Kinabalu, Sabah	409	Severe Plasmodium knowlesi malaria in a tertiary care hospital, Sabah, Malaysia, William et al, 2011
101	Mixed Pk/Pm	PCR	1	Dec 2007 - Nov 2009	2009	Malaysia	Queen Elizabeth Hospital, Kota Kinabalu, Sabah	409	Severe Plasmodium knowlesi malaria in a tertiary care hospital, Sabah, Malaysia, William et al, 2011
102	P knowlesi	PCR	345	Jan 2009 - Nov 2011	2011	Malaysia	Kudat, Sabah	149	Epidemiology of Plasmodium knowlesi malaria in north-east Sabah, Malaysia: family clusters and wide age distribution, Barber et al, 2012
103	Mixed Pk/Pv	PCR	36	Jan 2009 - Nov 2011	2011	Malaysia	Kudat, Sabah	149	Epidemiology of Plasmodium knowlesi malaria in north-east Sabah, Malaysia: family clusters and wide age distribution, Barber et al, 2012
104	Mixed Pk/Pf	PCR	6	Jan 2009 - Nov 2011	2011	Malaysia	Kudat, Sabah	149	Epidemiology of Plasmodium knowlesi malaria in north-east Sabah, Malaysia: family clusters and wide age distribution, Barber et al, 2012
105	Mixed Pk/Pv/Pf	PCR	2	Jan 2009 - Nov 2011	2011	Malaysia	Kudat, Sabah	149	Epidemiology of Plasmodium knowlesi malaria in north-east Sabah, Malaysia: family clusters and wide age distribution, Barber et al, 2012
106	Mixed Pm/Pk	PCR	1	Jan 2009 - Nov 2011	2011	Malaysia	Kudat, Sabah	149	Epidemiology of Plasmodium knowlesi malaria in north-east Sabah, Malaysia: family clusters and wide age distribution, Barber et al, 2012
107	Mixed Pk/Pv/Pm	PCR	2	Jan 2009 - Nov 2011	2011	Malaysia	Kudat, Sabah	149	Epidemiology of Plasmodium knowlesi malaria in north-east Sabah, Malaysia: family clusters and wide age distribution, Barber et al, 2012
108	P knowlesi	PCR	1	2008	2008	Malaysia	Kubang Kerian, Kelantan	72	Case series of naturally acquired Plasmodium knowlesi infection in a tertiary teaching hospital. Azira et al., 2012
109	P knowlesi	PCR	1	2008	2008	Malaysia	Kubang Kerian, Kelantan	72	Case series of naturally acquired Plasmodium knowlesi infection in a tertiary teaching hospital. Azira et al., 2012
110	P knowlesi	PCR	1	2009	2009	Malaysia	Kubang Kerian, Kelantan	72	Case series of naturally acquired Plasmodium knowlesi infection in a tertiary teaching hospital. Azira et al., 2012
111	P knowlesi	PCR	6	2010-2011	2011	Malaysia	Sabah	101	Deaths due to Plasmodium knowlesi malaria in Sabah, Malaysia: association with reporting as Plasmodium malariae and delayed parenteral artesunate. Rajahram et al., 2012
112	P knowlesi	Sequencing	2	Jun-08	2008	Thailand	Ranong	211	Human Plasmodium knowlesi infection in Ranong province, southwestern border of Thailand, Sermwittayawong et al, 2012
113	P knowlesi	PCR	110	July 2007 - Jan 2010	2010	Malaysia	Sarikei and Sibu	260	Laboratory markers of disease severity in Plasmodium knowlesi infection: a case control study, Willmann et al, 2012
115	P knowlesi	PCR, sequencing	1	Jan-13	2013	Thailand	Khao Sok National Park	356	Plasmodium knowlesi infection imported to Germany, January 2013. Bart et al., 2013
117	Mixed Pk/Pf	PCR	3	Sept 2010 - Oct 2011	2011	Malaysia	Queen Elizabeth Hospital, Kota Kinabalu, Sabah	263	Limitations of microscopy to differentiate Plasmodium species in a region co-endemic for Plasmodium falciparum, Plasmodium vivax and Plasmodium knowlesi, Barber et al, 2013
118	P knowlesi	PCR	42	2008-2011	2011	Malaysia	Sandakan, Sabah	231	Increased detection of Plasmodium knowlesi in Sandakan division, Sabah as revealed by PlasmoNex™. Gih et al 2013
119	P knowlesi	PCR, sequencing	1	2012	2012	Malaysia	Johor	217	Hyperparasitaemic human Plasmodium knowlesi infection with atypical morphology in peninsular Malaysia
120	P knowlesi	PCR	1	Apr-12	2012	Malaysia	Ranau, Sabah	68	Case Report: Fatal Plasmodium Knowlesi Malaria Following an Atypical Clinical Presentation and Delayed Diagnosis. Rajahram et al., 2013
121	P knowlesi	PCR, sequencing	1	Sep-12	2012	Malaysia	Temengor (or Johor or KL)	184	First case of Plasmodium knowlesi infection in a Japanese traveller returning from Malaysia. Tanizaki et al., 2013
122	P knowlesi	PCR	232	2008-2011	2011	Malaysia	Sarawak	122	Disease progression in Plasmodium knowlesi malaria is linked to variation in invasion gene family members. Ahmed et al.2014
123	P knowlesi	Morphology	1	2013	2013	Malaysia	Kelantan	408	Severe Plasmodium knowlesi infection with multiorgan involvement in north east peninsular Malaysia. Azidah et al 2014
124	P knowlesi	PCR	1	Jul-12	2012	Malaysia	Borneo	374	Plasmodium knowlesi: clinical presentation and laboratory diagnosis of the first human case in a Scottish traveler. Cordina et al 2014
125	P knowlesi	PCR	2	Jan 2008-Dec 2010	2010	Cambodia	Kraitie and/or Pailin province	8	Acute Undifferentiated Febrile Illness in Rural Cambodia: A 3-Year Prospective Observational Study. Mueller et al., 2014
126	P knowlesi	Sequencing	1	Dec-13	2013	South-East Asia	Mecleod/Khura Buri, Koh Ra, Khao Lak, Phuket	407	Severe Plasmodium knowlesi infection with multi-organ failure imported to Germany from Thailand/Myanmar, Seilmaier, 2014
127	P cynomolgi	Sequencing	1	Jan-11	2011	Malaysia	Hulu Terengganu	171	First case of a naturally acquired human infection with Plasmodium cynomolgi
128	P knowlesi/P malariae	Morphology	21	2009	2009	Malaysia	Selangor	361	Plasmodium knowlesi malaria an emerging public health problem in Hulu Selangor, Selangor, Malaysia (2009-2013): epidemiologic and entomologic analysis, Vythilingam et al, 2014
129	P knowlesi/P malariae	Morphology	25	2010	2010	Malaysia	Selangor	361	Plasmodium knowlesi malaria an emerging public health problem in Hulu Selangor, Selangor, Malaysia (2009-2013): epidemiologic and entomologic analysis, Vythilingam et al, 2014
130	P knowlesi/P malariae	Morphology	43	2011	2011	Malaysia	Selangor	361	Plasmodium knowlesi malaria an emerging public health problem in Hulu Selangor, Selangor, Malaysia (2009-2013): epidemiologic and entomologic analysis, Vythilingam et al, 2014
131	P knowlesi/P malariae	Morphology	41	2012	2012	Malaysia	Selangor	361	Plasmodium knowlesi malaria an emerging public health problem in Hulu Selangor, Selangor, Malaysia (2009-2013): epidemiologic and entomologic analysis, Vythilingam et al, 2014
132	P knowlesi/P malariae	Morphology	41	2013	2013	Malaysia	Selangor	361	Plasmodium knowlesi malaria an emerging public health problem in Hulu Selangor, Selangor, Malaysia (2009-2013): epidemiologic and entomologic analysis, Vythilingam et al, 2014
133	P knowlesi	Sequencing	80	Sept 2012 - Dec 2013	2013	Malaysia	Sarawak	203	High proportion of knowlesi malaria in recent malaria cases in Malaysia, Yusof et al, 2014
134	P knowlesi	Sequencing	82	Sept 2012 - Dec 2013	2013	Malaysia	Sabah	203	High proportion of knowlesi malaria in recent malaria cases in Malaysia, Yusof et al, 2014
135	P knowlesi	Sequencing	16	Sept 2012 - Dec 2013	2013	Malaysia	Selangor	203	High proportion of knowlesi malaria in recent malaria cases in Malaysia, Yusof et al, 2014
136	P knowlesi	Sequencing	40	Sept 2012 - Dec 2013	2013	Malaysia	Kelantan	203	High proportion of knowlesi malaria in recent malaria cases in Malaysia, Yusof et al, 2014
137	P knowlesi	Sequencing	24	Sept 2012 - Dec 2013	2013	Malaysia	Pahang	203	High proportion of knowlesi malaria in recent malaria cases in Malaysia, Yusof et al, 2014
138	P knowlesi	Sequencing	4	Sept 2012 - Dec 2013	2013	Malaysia	Negeri Sembilan	203	High proportion of knowlesi malaria in recent malaria cases in Malaysia, Yusof et al, 2014
139	P knowlesi	Sequencing	6	Sept 2012 - Dec 2013	2013	Malaysia	Johor	203	High proportion of knowlesi malaria in recent malaria cases in Malaysia, Yusof et al, 2014
140	P knowlesi	Sequencing	4	Sept 2012 - Dec 2013	2013	Malaysia	Terengganu	203	High proportion of knowlesi malaria in recent malaria cases in Malaysia, Yusof et al, 2014
141	Mixed (Pk/Pv)	Sequencing	3	Sept 2012 - Dec 2013	2013	Malaysia	Sarawak	203	High proportion of knowlesi malaria in recent malaria cases in Malaysia, Yusof et al, 2014
142	Mixed (Pk/Pv)	Sequencing	1	Sept 2012 - Dec 2013	2013	Malaysia	Sabah	203	High proportion of knowlesi malaria in recent malaria cases in Malaysia, Yusof et al, 2014
143	Mixed (Pk/Pv)	Sequencing	2	Sept 2012 - Dec 2013	2013	Malaysia	Selangor	203	High proportion of knowlesi malaria in recent malaria cases in Malaysia, Yusof et al, 2014
144	Mixed (Pk/Pv)	Sequencing	2	Sept 2012 - Dec 2013	2013	Malaysia	Kelantan	203	High proportion of knowlesi malaria in recent malaria cases in Malaysia, Yusof et al, 2014
145	Mixed (Pk/Pv)	Sequencing	1	Sept 2012 - Dec 2013	2013	Malaysia	Negeri Sembilan	203	High proportion of knowlesi malaria in recent malaria cases in Malaysia, Yusof et al, 2014
146	Mixed (Pk/Pv)	Sequencing	1	Sept 2012 - Dec 2013	2013	Malaysia	Johor	203	High proportion of knowlesi malaria in recent malaria cases in Malaysia, Yusof et al, 2014
147	Mixed (Pk/Pf)	Sequencing	1	Sept 2012 - Dec 2013	2013	Malaysia	Sabah	203	High proportion of knowlesi malaria in recent malaria cases in Malaysia, Yusof et al, 2014
148	P knowlesi/P malariae	Morphology	333	Jan 2012-Dec 2013	2013	Malaysia	Sabah	362	Plasmodium knowlesi malaria during pregnancy. Barber et al 2015
149	P knowlesi	PCR	43	Jul 2011 - Mar 2014	2014	Malaysia	Sabah	362	Plasmodium knowlesi malaria during pregnancy. Barber et al 2015
150	P knowlesi	PCR	1	Feb-13	2014	Thailand	Khao Khitchakut National Park	50	An autochthonous case of severe Plasmodium knowlesi malaria in Thailand. Nakarviroj et al 2015
151	P knowlesi	Morphology	1	2016 ? publication date	2016	Malaysia	Sabah	240	Intravascular haemolysis with haemoglobinuria in a splenectomized patient with severe Plasmodium knowlesi malaria. Barber et al 2016
152	P knowlesi	PCR	1	2016	2016	Malaysia	Pitas District Hospital, Sabah	439	Transfusion-transmitted severe Plasmodium knowlesi malaria in a splenectomized patient with beta-thalassaemia major in Sabah, Malaysia: a case report, Bird et al, 2016
153	P knowlesi	PCR	1	2016	2016	Thailand	Betong hospital, Yala	168	A fatal malaria caused by Plasmodium knowlesi infection in a healthy man, Betong, Yala, Thailand April, 2016, Chantaramongkol et al, 2016
154	P knowlesi	PCR	20	2014-2015	2015	Indonesia	Aceh Besar, Indonesia	292	Malaria risk factor assessment using active and passive surveillance data from Aceh Besar, Indonesia, a low endemic, malaria elimination setting with Plasmodium knowlesi, Plasmodium vivax, and Plasmodium falciparum. Herdiana et al. 2016
155	P knowlesi	PCR	23	pub 2016	2016	Malaysia	Gombak	432	Submicroscopic Evidence of the Simian Malaria Parasite, Plasmodium Knowlesi, in an Orang Asli Community. Jiram et al 2016
156	Mixed (Pk/Pf)	PCR	6	pub 2016	2016	Malaysia	Gombak	432	Submicroscopic Evidence of the Simian Malaria Parasite, Plasmodium Knowlesi, in an Orang Asli Community. Jiram et al 2016
157	Mixed (Pk/Pv)	PCR	6	pub 2016	2016	Malaysia	Gombak	432	Submicroscopic Evidence of the Simian Malaria Parasite, Plasmodium Knowlesi, in an Orang Asli Community. Jiram et al 2016
158	Mixed (Pk/Pf/Pv)	PCR	1	pub 2016	2016	Malaysia	Gombak	432	Submicroscopic Evidence of the Simian Malaria Parasite, Plasmodium Knowlesi, in an Orang Asli Community. Jiram et al 2016
159	P knowlesi	PCR	1	Feb-15	2015	Thailand	Ranhong province/Khiri Khan province/Bangkok	391	Rapid-Antigen Test Negative Malaria in a Traveler Returning From Thailand, Molecularly Diagnosed as Plasmodium knowlesi. Mackroth et al 2016
160	P knowlesi	Sequencing	1	pub 2016	2016	Myanmar		176	[The first monkey malaria in Turkey: a case of Plasmodium knowlesi]. Ozbilgin et al 2016
161	P knowlesi	Sequencing	1	Sep-14	2014	Indonesia	Central Kalimantan	460	A zoonotic human infection with simian malaria, Plasmodium knowlesi, in Central Kalimantan, Indonesia. Setiadi et al 2016
162	P knowlesi (+ dengue)	PCR	1	pub 2017	2017	Malaysia	Jeli	410	Distribution and prevalence of malaria parasites among long-tailed macaques (Macaca fascicularis) in regional populations across Southeast Asia. Zhang et al 2016
163	P knowlesi	PCR	1	Jul-16	2016	Philippines	Palawan	363	Plasmodium knowlesi malaria in a traveller returning from the Philippines to Italy, 2016. De Canale et al 2017
164	P knowlesi	Sequencing	1	Oct-16	2016	Malaysia	Johor Bahru	117	Diagnostic challenges and case management of the first imported case of Plasmodium knowlesi in Sri Lanka. Dewanee Ranaweera et al., 2017
165	P knowlesi	Sequencing	16	Aug - Sept 2013	2013	Myanmar	Phyu	278	Malaria epidemiology in central Myanmar: identification of a multi-species asymptomatic reservoir of infection, Ghinai et al, 2017
166	Mixed (Pk/Pv)	Sequencing	1	Aug - Sept 2013	2013	Myanmar	Phyu	278	Malaria epidemiology in central Myanmar: identification of a multi-species asymptomatic reservoir of infection, Ghinai et al, 2017
167	P knowlesi	PCR	148	Dec 2012 - Jan 2015	2015	Malaysia	Kudat, Sabah	235	Individual-level factors associated with the risk of acquiring human Plasmodium knowlesi malaria in Malaysia: a case-control study. Grigg et al 2017
168	P knowlesi	PCR	81	Dec 2012 - Jan 2015	2015	Malaysia	Kota Marudu, Sabah	235	Individual-level factors associated with the risk of acquiring human Plasmodium knowlesi malaria in Malaysia: a case-control study. Grigg et al 2017
169	P knowlesi	PCR	216	Jan- Jun 2015	2015	Indonesia	North Sumatera	94	Contribution of Plasmodium knowlesi to Multispecies Human Malaria Infections in North Sumatera, Indonesia. Lubis et al 2017
170	Mixed (Pk/Pv)	PCR	65	Jan- Jun 2015	2015	Indonesia	North Sumatera	94	Contribution of Plasmodium knowlesi to Multispecies Human Malaria Infections in North Sumatera, Indonesia. Lubis et al 2017
171	Mixed (Pk/other)	PCR	97	Jan- Jun 2015	2015	Indonesia	North Sumatera	94	Contribution of Plasmodium knowlesi to Multispecies Human Malaria Infections in North Sumatera, Indonesia. Lubis et al 2017
172	P knowlesi	PCR	7	Jan 2014–Oct 2015	2015	Malaysia	Betong, Sarawak	3	Absence of Plasmodium inui and Plasmodium cynomolgi, but detection of Plasmodium knowlesi and Plasmodium vivax infections in asymptomatic humans in the Betong division of Sarawak, Malaysian Borneo. Siner et al 2018
173	P knowlesi	PCR	1	Jan-17	2017	Thailand	maybe Koh Chang	357	Plasmodium knowlesi infection in a returning German traveller from Thailand: a case report on an emerging malaria pathogen in a popular low-risk travel destination. Froeschl et al 2018
174	P knowlesi	PCR	1	Jan-14	2014	Indonesia	Balohan, Sabang, Aceh	448	Two clusters of Plasmodium knowlesi cases in a malaria elimination area, Sabang Municipality, Aceh, Indonesia, Herdiana et al, 2018
175	P knowlesi	PCR	1	Feb-14	2014	Indonesia	Batee Shok, Sabang, Aceh	448	Two clusters of Plasmodium knowlesi cases in a malaria elimination area, Sabang Municipality, Aceh, Indonesia, Herdiana et al, 2019
176	P knowlesi	PCR	1	Jun-14	2014	Indonesia	Balohan, Sabang, Aceh	448	Two clusters of Plasmodium knowlesi cases in a malaria elimination area, Sabang Municipality, Aceh, Indonesia, Herdiana et al, 2020
177	P knowlesi	PCR	1	Jun-14	2014	Indonesia	Keuneukei, Sabang, Aceh	448	Two clusters of Plasmodium knowlesi cases in a malaria elimination area, Sabang Municipality, Aceh, Indonesia, Herdiana et al, 2021
178	P knowlesi	PCR	1	Aug-14	2014	Indonesia	Balohan, Sabang, Aceh	448	Two clusters of Plasmodium knowlesi cases in a malaria elimination area, Sabang Municipality, Aceh, Indonesia, Herdiana et al, 2022
179	P knowlesi	PCR	1	Dec-14	2014	Indonesia	Batee Shok, Sabang, Aceh	448	Two clusters of Plasmodium knowlesi cases in a malaria elimination area, Sabang Municipality, Aceh, Indonesia, Herdiana et al, 2023
180	P knowlesi	PCR	8	Oct - Nov 2014	2014	Indonesia	Iboih Village, Sabang, Aceh	448	Two clusters of Plasmodium knowlesi cases in a malaria elimination area, Sabang Municipality, Aceh, Indonesia, Herdiana et al, 2024
181	P knowlesi	PCR	1	Dec-14	2014	Indonesia	le Meulee Village, Sabang, Aceh	448	Two clusters of Plasmodium knowlesi cases in a malaria elimination area, Sabang Municipality, Aceh, Indonesia, Herdiana et al, 2025
182	P knowlesi	Sequencing	1	Jul-16	2016	Laos	Bengvilay village, Sanamxay district, Attapeu province	173	First case of human infection with Plasmodium knowlesi in Laos, Iwagami et al, 2018
183	P knowlesi	PCR	1	pub 2018	2018	Philippines	Bacungan, Palawan	71	Case Report: Plasmodium knowlesi Infection with Rhabdomyolysis in a Japanese Traveler to Palawan, the Philippines. Takaya et al. 2018
184	P cynomolgi	Sequencing	1	2015	2015	Malaysia	Ranau, Sabah	324	Natural Human Infections With Plasmodium cynomolgi and Other Malaria Species in an Elimination Setting in Sabah, Malaysia. Grignard et al 2019
185	P knowlesi	Sequencing	1	2015	2015	Malaysia	Ranau, Sabah	324	Natural Human Infections With Plasmodium cynomolgi and Other Malaria Species in an Elimination Setting in Sabah, Malaysia. Grignard et al 2019
186	P cynomolgi	Sequencing	1	2015	2015	Malaysia	Kudat, Sabah	324	Natural Human Infections With Plasmodium cynomolgi and Other Malaria Species in an Elimination Setting in Sabah, Malaysia. Grignard et al 2019
187	P knowlesi	Sequencing	2	2015	2015	Malaysia	Kudat, Sabah	324	Natural Human Infections With Plasmodium cynomolgi and Other Malaria Species in an Elimination Setting in Sabah, Malaysia. Grignard et al 2019
188	P cynomolgi	Sequencing	1	2018	2018	Thailand	Probably khao sok	345	Plasmodium cynomolgi as Cause of Malaria in Tourist to Southeast Asia, 2018. Hartmeyer et al 2019
189	P knowlesi	Sequencing	1	Jun 2013 - Jun 2014	2014	Cambodia	Pailin	48	Asymptomatic Natural Human Infections With the Simian Malaria Parasites Plasmodium cynomolgi and Plasmodium knowlesi, Imwong et al, 2019
190	P knowlesi	Sequencing	1	Mar 2015 - May 2015	2015	Cambodia	Battambang	48	Asymptomatic Natural Human Infections With the Simian Malaria Parasites Plasmodium cynomolgi and Plasmodium knowlesi, Imwong et al, 2019
191	P knowlesi	Sequencing	6	July 2015 - Nov 2016	2016	Cambodia	Battambang	48	Asymptomatic Natural Human Infections With the Simian Malaria Parasites Plasmodium cynomolgi and Plasmodium knowlesi, Imwong et al, 2019
192	P cynomolgi	Sequencing	11	July 2015 - Nov 2016	2016	Cambodia	Battambang	48	Asymptomatic Natural Human Infections With the Simian Malaria Parasites Plasmodium cynomolgi and Plasmodium knowlesi, Imwong et al, 2019
193	Mixed (Pcyn+Pv)	Sequencing	2	July 2015 - Nov 2016	2016	Cambodia	Battambang	48	Asymptomatic Natural Human Infections With the Simian Malaria Parasites Plasmodium cynomolgi and Plasmodium knowlesi, Imwong et al, 2019
194	P knowlesi	NM-PCR	9	2014	2014	Malaysia	Belaga District, Sarawak	158	Evidence of asymptomatic submicroscopic malaria in low transmission areas in Belaga district, Kapit division, Sarawak, Malaysia. Jiram et al 2019
195	Mixed (Pk/Pv)	NM-PCR	3	2014	2014	Malaysia	Belaga District, Sarawak	158	Evidence of asymptomatic submicroscopic malaria in low transmission areas in Belaga district, Kapit division, Sarawak, Malaysia. Jiram et al 2019
196	P knowlesi	Morphology	73	2007-2017	2017	Brunei	Brunei	339	Occupationally Acquired Plasmodium knowlesi Malaria in Brunei Darussalam, Koh et al, 2019
197	P knowlesi	PCR	1	Jun-18	2018	South-East Asia	? Sumatra	64	Case of Plasmodium knowlesi Malaria in Poland Linked to Travel in Southeast Asia, Nowak et al, 2019
198	P knowlesi	PCR	4	pub 2019	2019	Malaysia	Johor	187	Genetic diversity of Plasmodium knowlesi among human and long-tailed macaque populations in Peninsular Malaysia: The utility of microsatellite markers, Saleh Huddin et al, 2019
199	P knowlesi	PCR	63	pub 2019	2019	Malaysia	Kelantan	187	Genetic diversity of Plasmodium knowlesi among human and long-tailed macaque populations in Peninsular Malaysia: The utility of microsatellite markers, Saleh Huddin et al, 2019
200	P knowlesi	PCR	6	pub 2019	2019	Malaysia	Melaka	187	Genetic diversity of Plasmodium knowlesi among human and long-tailed macaque populations in Peninsular Malaysia: The utility of microsatellite markers, Saleh Huddin et al, 2019
201	P knowlesi	PCR	6	pub 2019	2019	Malaysia	N. Sembilan	187	Genetic diversity of Plasmodium knowlesi among human and long-tailed macaque populations in Peninsular Malaysia: The utility of microsatellite markers, Saleh Huddin et al, 2019
202	P knowlesi	PCR	65	pub 2019	2019	Malaysia	Pahang	187	Genetic diversity of Plasmodium knowlesi among human and long-tailed macaque populations in Peninsular Malaysia: The utility of microsatellite markers, Saleh Huddin et al, 2019
203	P knowlesi	PCR	1	pub 2019	2019	Malaysia	Pulau Pinang	187	Genetic diversity of Plasmodium knowlesi among human and long-tailed macaque populations in Peninsular Malaysia: The utility of microsatellite markers, Saleh Huddin et al, 2019
204	P knowlesi	PCR	6	pub 2019	2019	Malaysia	Selangor & KL	187	Genetic diversity of Plasmodium knowlesi among human and long-tailed macaque populations in Peninsular Malaysia: The utility of microsatellite markers, Saleh Huddin et al, 2019
205	P knowlesi	PCR	13	pub 2019	2019	Malaysia	Terengganu	187	Genetic diversity of Plasmodium knowlesi among human and long-tailed macaque populations in Peninsular Malaysia: The utility of microsatellite markers, Saleh Huddin et al, 2019
206	P knowlesi	PCR	1	Nov-17	2017	Thailand	Songkhla province	67	Case Report: Case Series of Human Plasmodium knowlesi Infection on the Southern Border of Thailand. Ngernna et al 2019
207	P knowlesi	PCR	1	Feb-18	2018	Thailand	Songkhla province	67	Case Report: Case Series of Human Plasmodium knowlesi Infection on the Southern Border of Thailand. Ngernna et al 2019
209	P knowlesi	PCR	3	Apr-18	2018	Thailand	Songkhla province	67	Case Report: Case Series of Human Plasmodium knowlesi Infection on the Southern Border of Thailand. Ngernna et al 2019
210	P knowlesi	PCR	1	Jan-18	2018	Thailand	Narathiwat province	67	Case Report: Case Series of Human Plasmodium knowlesi Infection on the Southern Border of Thailand. Ngernna et al 2019
211	P knowlesi	PCR	1	pub 2020	2020	Malaysia	Lahad Datu, Sabah	66	A case of severe Plasmodium knowlesi malaria in a post-splenectomy patient. Cheo et al 2020
212	P knowlesi	PCR	1	2011-2018	2018	India	Bihar	396	Renal detection of Plasmodium falciparum, Plasmodium vivax and Plasmodium knowlesi in malaria associated acute kidney injury: a retrospective case-control study. Kaur et al 2020
213	Mixed (Pk/Pv)	PCR	1	2011-2018	2018	India	Unknown	396	Renal detection of Plasmodium falciparum, Plasmodium vivax and Plasmodium knowlesi in malaria associated acute kidney injury: a retrospective case-control study. Kaur et al 2020
213	Mixed (Pk/Pv)	PCR	1	2011-2018	2018	India	Dehli	396	Renal detection of Plasmodium falciparum, Plasmodium vivax and Plasmodium knowlesi in malaria associated acute kidney injury: a retrospective case-control study. Kaur et al 2020
214	Mixed (Pk/Pf/Pv)	PCR	2	2011-2018	2018	India	Dehli	396	Renal detection of Plasmodium falciparum, Plasmodium vivax and Plasmodium knowlesi in malaria associated acute kidney injury: a retrospective case-control study. Kaur et al 2020
215	Mixed (Pk/Pf/Pv)	PCR	2	2011-2018	2018	India	Uttar Pradesh	396	Renal detection of Plasmodium falciparum, Plasmodium vivax and Plasmodium knowlesi in malaria associated acute kidney injury: a retrospective case-control study. Kaur et al 2020
216	P knowlesi	PCR	5	Jul 2017-Sept 2018	2018	India		46	Association of dengue virus and leptospira co-infections with malaria severity. Mandage et al 2020
217	Mixed (Pk/Pv)	PCR	4	Jul 2017-Sept 2018	2018	India		46	Association of dengue virus and leptospira co-infections with malaria severity. Mandage et al 2020
218	Mixed (Pk/Pf)	PCR	1	Jul 2017-Sept 2018	2018	India		46	Association of dengue virus and leptospira co-infections with malaria severity. Mandage et al 2020
219	Mixed (Pk/Pf/Pv)	PCR	2	Jul 2017-Sept 2018	2018	India		46	Association of dengue virus and leptospira co-infections with malaria severity. Mandage et al 2020
220	P knowlesi	PCR	6	Jun 2019 - Jan 2020	2020	Malaysia	Kota Tinggi, Johor	383	Prevalence of Asymptomatic and/or Low-Density Malaria Infection among High-Risk Groups in Peninsular Malaysia, Noordin et al, 2020
221	P knowlesi	PCR	3	Jun 2019 - Jan 2020	2020	Malaysia	Kluang, Johor	383	Prevalence of Asymptomatic and/or Low-Density Malaria Infection among High-Risk Groups in Peninsular Malaysia, Noordin et al, 2020
222	P knowlesi	PCR	1	Jun 2019 - Jan 2020	2020	Malaysia	Mersing, Johor	383	Prevalence of Asymptomatic and/or Low-Density Malaria Infection among High-Risk Groups in Peninsular Malaysia, Noordin et al, 2020
223	P knowlesi	Sequencing	815	24 June 2013- 31 Dec 2017	2017	Malaysia	Kapit/Song districts, Sarawak	329	Naturally Acquired Human Plasmodium cynomolgi and P. knowlesi Infections, Malaysian Borneo (Raja et al 2010)
224	Mixed (Pk/Pcyn)	Sequencing	6	24 June 2013- 31 Dec 2017	2017	Malaysia	Kapit/Song districts, Sarawak	329	Naturally Acquired Human Plasmodium cynomolgi and P. knowlesi Infections, Malaysian Borneo (Raja et al 2010)
225	Mixed (Pk/Pf)	Sequencing	12	24 June 2013- 31 Dec 2017	2017	Malaysia	Kapit/Song districts, Sarawak	329	Naturally Acquired Human Plasmodium cynomolgi and P. knowlesi Infections, Malaysian Borneo (Raja et al 2010)
226	Mixed (Pk/Pv)	Sequencing	12	24 June 2013- 31 Dec 2017	2017	Malaysia	Kapit/Song districts, Sarawak	329	Naturally Acquired Human Plasmodium cynomolgi and P. knowlesi Infections, Malaysian Borneo (Raja et al 2010)
227	P knowlesi	Morphology	340	Jan-Aug 2016	2016	Malaysia	Sabah	385	Prevalence of malaria and its risk factors in Sabah, Malaysia. Ramdzan et al 2020
228	P knowlesi	Sequencing	1	Feb-18	2018	Malaysia	Johor	358	Plasmodium knowlesi infection in an Australian soldier following jungle warfare training in Malaysia. Roe et al 2020
229	P knowlesi	PCR	1	Jan-19	2019	Thailand	Surat Thani	273	Malaria cross-sectional surveys identified asymptomatic infections of Plasmodium falciparum, Plasmodium vivax and Plasmodium knowlesi in Surat Thani, a southern province of Thailand, Shimizu et al, 2020
230	P knowlesi	PCR	2	May-19	2019	Thailand	Surat Thani	273	Malaria cross-sectional surveys identified asymptomatic infections of Plasmodium falciparum, Plasmodium vivax and Plasmodium knowlesi in Surat Thani, a southern province of Thailand, Shimizu et al, 2020
